# Supplementary material for: Study of graphene plasmons in graphene–MoS2heterostructures for optoelectronic integrated devices
Source: Royal Society of Chemistry journal article supplement (doi:10.1039/c6nr07081g), 2016-11-18
Supplement: c6nr07081g1.pdf [file c6nr07081g1.pdf]

## Supplementary Information

### Study of graphene plasmons in graphene-MoS<sub>2</sub> heterostructures for optoelectronic integrated devices

Ruina Liu,<sup>a</sup> Baoxin Liao,<sup>a</sup> Xiangdong Guo,<sup>a</sup> Debo Hu,<sup>a</sup> Hai Hu,<sup>a</sup> LuoJun Du,<sup>b</sup> Hua Yu,<sup>b</sup> Guangyu Zhang,<sup>b</sup>  
Xiaoxia Yang,<sup>\*a</sup> Qing Dai<sup>\*a</sup>

<sup>a</sup> China CAS Center for Excellence in Nanoscience, National Center for Nanoscience and Technology, Beijing 100190, P. R. China

<sup>b</sup> Beijing National Laboratory for Condensed Matter Physics and Institute of Physics, Chinese Academy of sciences, Beijing 100190, P. R. China

†Corresponding E-mail: [daiq@nanoctr.cn](mailto:daiq@nanoctr.cn), [yangxx@nanoctr.cn](mailto:yangxx@nanoctr.cn)

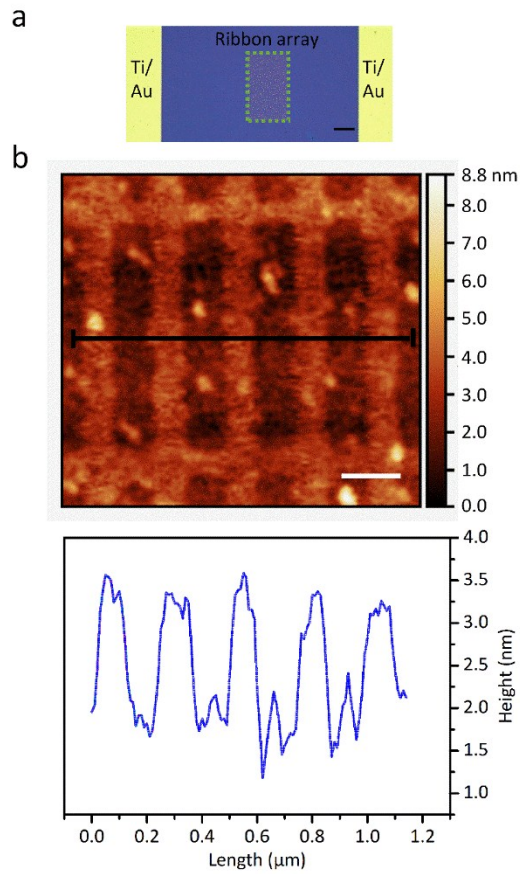

**Fig. S1** (a) An optical image of the MoS<sub>2</sub>/graphene device, both graphene and MoS<sub>2</sub> layers were patterned into nanoribbon arrays. Scale bar is 50 μm. (b) Top: AFM image of a MoS<sub>2</sub> nanoribbon array with ribbon width of ~100 nm. The scale bar is 200 nm. Bottom: Linescan profile of the top image corresponding to the black line. The MoS<sub>2</sub> nanoribbons had uniform thickness about 1.9 nm.

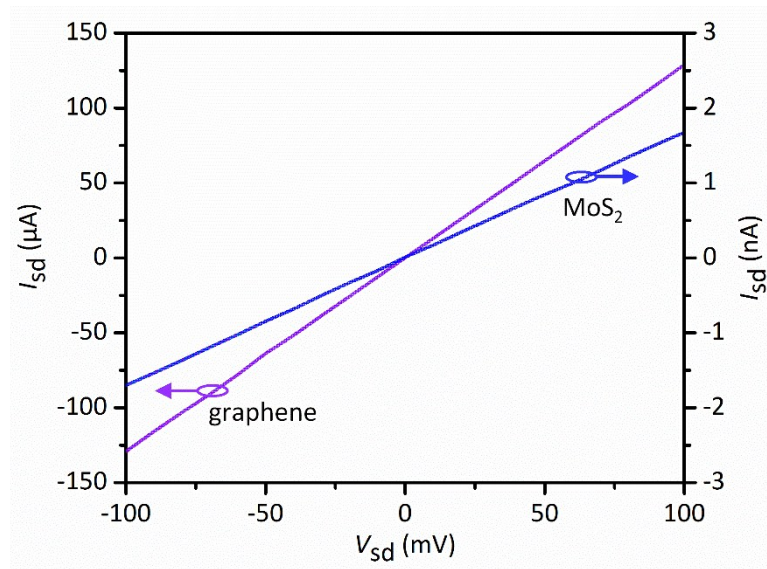

**Fig. S2** Output curves of monolayer graphene and monolayer MoS<sub>2</sub> devices on SiO<sub>2</sub>/Si, respectively. The linearity indicates that Ohmic contact was formed between Ti and both the graphene and MoS<sub>2</sub> layers.

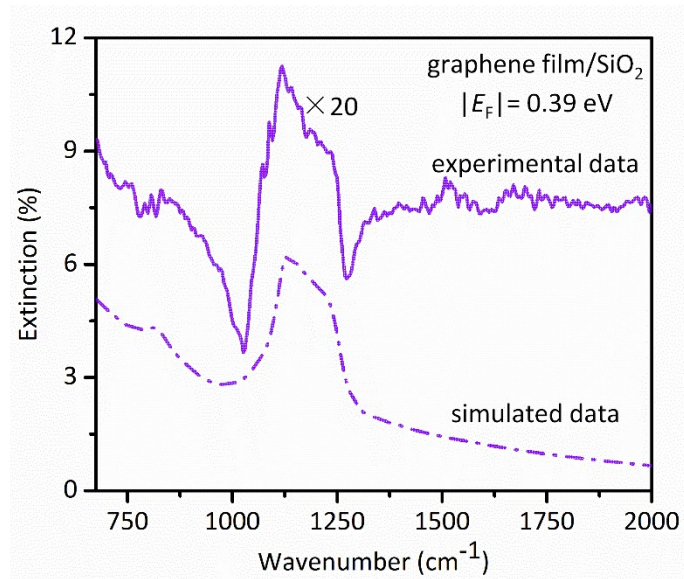

**Fig. S3** Experimental and simulated extinction spectra for graphene film on SiO<sub>2</sub> substrate (defined as graphene film/SiO<sub>2</sub> device). The extinction spectra were obtained at  $|E_F| = 0.39$  eV, using single-beam transmittance spectra at  $|E_F| = 0$  as a background. The experimental data was multiplied by 20.

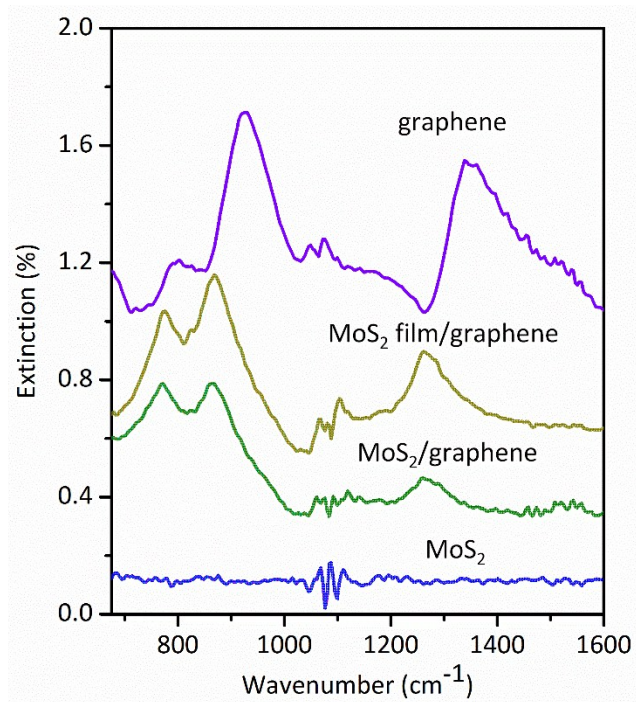

**Fig. S4** Extinction spectra of graphene, MoS<sub>2</sub> film/graphene, MoS<sub>2</sub>/graphene, and MoS<sub>2</sub> nanoribbon array devices. The first three ones were measured at equivalent  $\Delta_{CNP}$  (= 100 V). No distinct plasmon resonance was observed in the spectrum of MoS<sub>2</sub> nanoribbon array device which was measured at  $V_g=100$  V (corresponding to maximum current), using single-beam transmittance spectra at  $V_g=-37$  V (corresponding to its minimum current) as a background. The ribbon width was 100 nm.

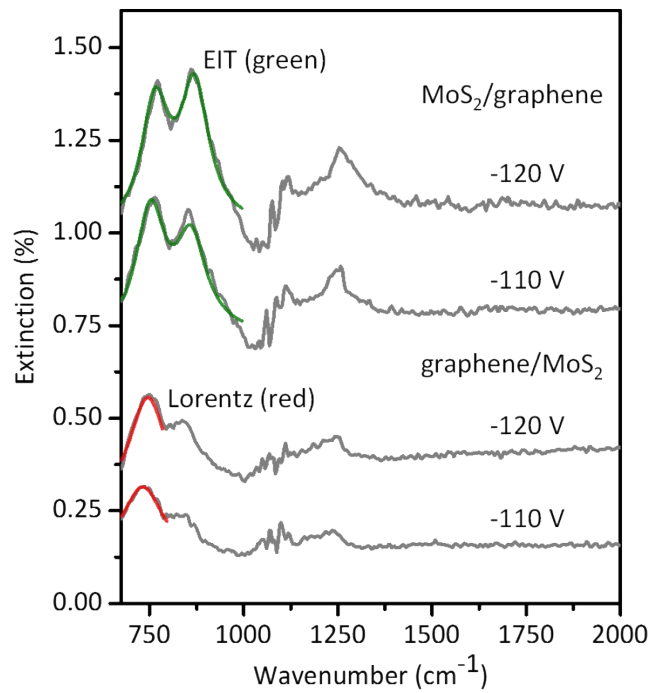

**Fig. S5** Illustration of the curve analysis methods to extract the full width at half-maximum (FWHM) ( $\Gamma$ ) of resonance peaks. Electromagnetic induced transparent (EIT) model is adapted when MoS<sub>2</sub>/graphene plasmon frequency is close to the phonon frequency of substrate SiO<sub>2</sub> (green curves). And the plasmonic peak is fitted by a Lorentz shape (red curves) for graphene/MoS<sub>2</sub> heterostructure. The detailed fitting method is following ref. 35 in the main text.<sup>1</sup> The calculated lifetime values for MoS<sub>2</sub>/graphene at -120 V and -110 V are 86 fs at 824 cm<sup>-1</sup> and 99 fs at 802 cm<sup>-1</sup>, respectively, and for graphene/MoS<sub>2</sub> are 83 fs at 748 cm<sup>-1</sup> and 78 fs at 734 cm<sup>-1</sup>, respectively.

### Calculation of carrier density, Fermi level, and mobility

For bare MoS<sub>2</sub> and bare graphene device, their carrier density were obtained using a standard parallel plate capacitor model, where  $ne = C_g V_g$ ,<sup>2</sup> and  $V_g - V_{CNP} = \hbar |v_F| \sqrt{\pi n} / e + ne / C_g$ ,<sup>3</sup> respectively.  $n$  is carrier density,  $C_g$  is the gate (SiO<sub>2</sub>) capacitance of  $1.2 \times 10^{-8} \text{ F cm}^{-2}$ ,<sup>4</sup>  $V_g$  is the gate voltage,  $V_{CNP}$  is the charge neutrality point voltage,  $v_F = 1.1 \times 10^6 \text{ m s}^{-1}$  is the fermi velocity. The carrier density of MoS<sub>2</sub> and graphene can be converted to their Fermi level using  $E_F = \hbar^2 \pi n / 2m_e$  and  $E_F = \hbar |v_F| \sqrt{\pi n}$ , respectively. Where  $m_e = 0.35m_0$ ,<sup>5</sup>  $m_0$  is the electron mass.

The field-effect mobility,  $\mu$ , is calculated by the formula:  $\mu = \frac{L_{ch}}{W_{ch} C_g V_{ds}} |g_m|$ ,<sup>6</sup> where  $L_{ch}$  and  $W_{ch}$  is the effective width and length of MoS<sub>2</sub> and graphene channel between drain and source electrodes, respectively.  $C_g$  is the gate (SiO<sub>2</sub>) capacitance of  $1.2 \times 10^{-8} \text{ F cm}^{-2}$ ,<sup>4</sup>  $V_{ds}$  is the drain-source voltage.  $g_m$  is transport transconductance,  $g_m = \left( \frac{\partial I_{ds}}{\partial V_{bg}} \right) V_{ds}$ , Where  $I_{ds}$  is the drain-source current,  $V_g$  is the bottom-gated voltage.

### Simulation method for extinction spectra

Finite element method was used to calculate the plasmonic behavior of graphene in bare graphene, MoS<sub>2</sub>/graphene, and graphene/MoS<sub>2</sub> devices. In the simulation setup, the plane waves were incident from normal directions with the electric field perpendicular to the nanoribbons. We used an effective electrical ribbon width of 68 nm, equal to the physical ribbon width 100 nm minus the width of 'inactive' edges 32 nm<sup>7</sup> and the width-to-pitch ratio of 1:2. For the optical constants in the simulation, surface conductivity of graphene was defined by Kubo formula in a complex form consisting of interband and intraband contributions.<sup>8</sup> The charge mobility of graphene was used as  $1000 \text{ cm}^2 / (\text{V} \cdot \text{s})$ . The dielectric constant of monolayer MoS<sub>2</sub> of 3.7 was adopted.<sup>9</sup> The thickness of graphene and MoS<sub>2</sub> were used as 0.35 nm and 0.6 nm, respectively.<sup>10, 11</sup> The spacing between graphene ribbons and the MoS<sub>2</sub> was chosen to be 0 nm, neglecting the influence of small gap between layers caused by the residual polymethyl methacrylate (PMMA) polymer during the device fabrication process. The mesh of 0.25 nm was chosen for simulation.

### Calculation of charge distribution in heterostructures via Thomas-Fermi charge screening theory

The Thomas-Fermi (T-F) charge screening theory has been widely used to calculate the charge distribution in multilayer graphene and multilayer MoS<sub>2</sub> field-effect transistors via the following two formulas.<sup>10, 12</sup>

$$\frac{Q_i}{Q_{i-1}} \approx \exp\left(-\frac{d_i - d_{i-1}}{\lambda}\right) = \exp\left(-\frac{d_{ML}}{\lambda}\right)$$

$$\sum_{i=1}^N Q_i = Q_{gate}$$

Where  $Q_i$  is the charge in the  $i$ th layer,  $d_i$  denotes the distance from bottom layer material to the  $i$ th layer,  $d_{ML}$  is the distance between layers,  $\lambda$  is T-F screening length,  $Q_{gate}$  is the total charge induced by gate.

In MoS<sub>2</sub>/graphene device, the charge distribution can be calculated via

$$\frac{Q_{MoS_2}}{Q_{graphene}} = \exp\left(-\frac{d_{MoS_2}}{\lambda_{graphene}}\right) = 0.37, \text{ where } d_{MoS_2} \text{ is the thickness of monolayer MoS}_2 \text{ (0.6 nm),}$$

$\lambda_{graphene}$  is the charge screening length of graphene (0.6 nm). Likewise, in graphene/MoS<sub>2</sub> device, the charge

distribution can be calculated via  $\frac{Q_{graphene}}{Q_{MoS_2}} = \exp\left(-\frac{d_{graphene}}{\lambda_{MoS_2}}\right) = 0.95$ , where  $d_{graphene}$  is the thickness

of monolayer graphene (0.35 nm),  $\lambda_{MoS_2}$  is the charge screening length of MoS<sub>2</sub> (7 nm). Thus, the charge density in graphene layer in MoS<sub>2</sub>/graphene and graphene/MoS<sub>2</sub> devices were calculated as ca. 73% and ca. 49% of that in bare graphene device.

## Notes and references

1. X. Yang, F. Zhai, H. Hu, D. Hu, R. Liu, S. Zhang, M. Sun, Z. Sun, J. Chen and Q. Dai, *Adv Mater*, 2016, 28, 2931-2938.
2. K. F. Mak, K. L. He, C. Lee, G. H. Lee, J. Hone, T. F. Heinz and J. Shan, *Nature Materials*, 2013, 12, 207-211.
3. A. Das, S. Pisana, B. Chakraborty, S. Piscanec, S. K. Saha, U. V. Waghmare, K. S. Novoselov, H. R. Krishnamurthy, A. K. Geim, A. C. Ferrari and A. K. Sood, *Nat Nanotechnol*, 2008, 3, 210-215.
4. H. L. Xu, Z. Y. Zhang, H. T. Xu, Z. X. Wang, S. Wang and L. M. Peng, *Acs Nano*, 2011, 5, 5031-5037.
5. T. Cheiwchanchamnangij and W. R. L. Lambrecht, *Physical Review B*, 2012, 85.
6. B. Radisavljevic and A. Kis, *Nature Materials*, 2013, 12, 815-820.
7. H. Yan, T. Low, W. Zhu, Y. Wu, M. Freitag, X. Li, F. Guinea, P. Avouris and F. Xia, *Nature Photonics*, 2013, 7, 394-399.
8. V. P. Gusynin, S. G. Sharapov and J. P. Carbotte, *Journal of Physics: Condensed Matter*, 2007, 19, 026222.
9. D. Davelou, G. Kopidakis, G. Kioseoglou and I. N. Remediakis, *Solid State Communications*, 2014, 192, 42-46.
10. Y. Sui and J. Appenzeller, *Nano Letters*, 2009, 9, 2973-2977.
11. A. Splendiani, L. Sun, Y. Zhang, T. Li, J. Kim, C. Y. Chim, G. Galli and F. Wang, *Nano Lett*, 2010, 10, 1271-1275.
12. S. Das and J. Appenzeller, *Nano Lett*, 2013, 13, 3396-3402.
